# Supplementary material for: Identifying trauma patients with benefit from direct transportation to Level-1 trauma centers
Source: PubMed Central journal article supplement (PMC8344140; doi:10.1186/s12873-021-00487-3), 2021-08-06

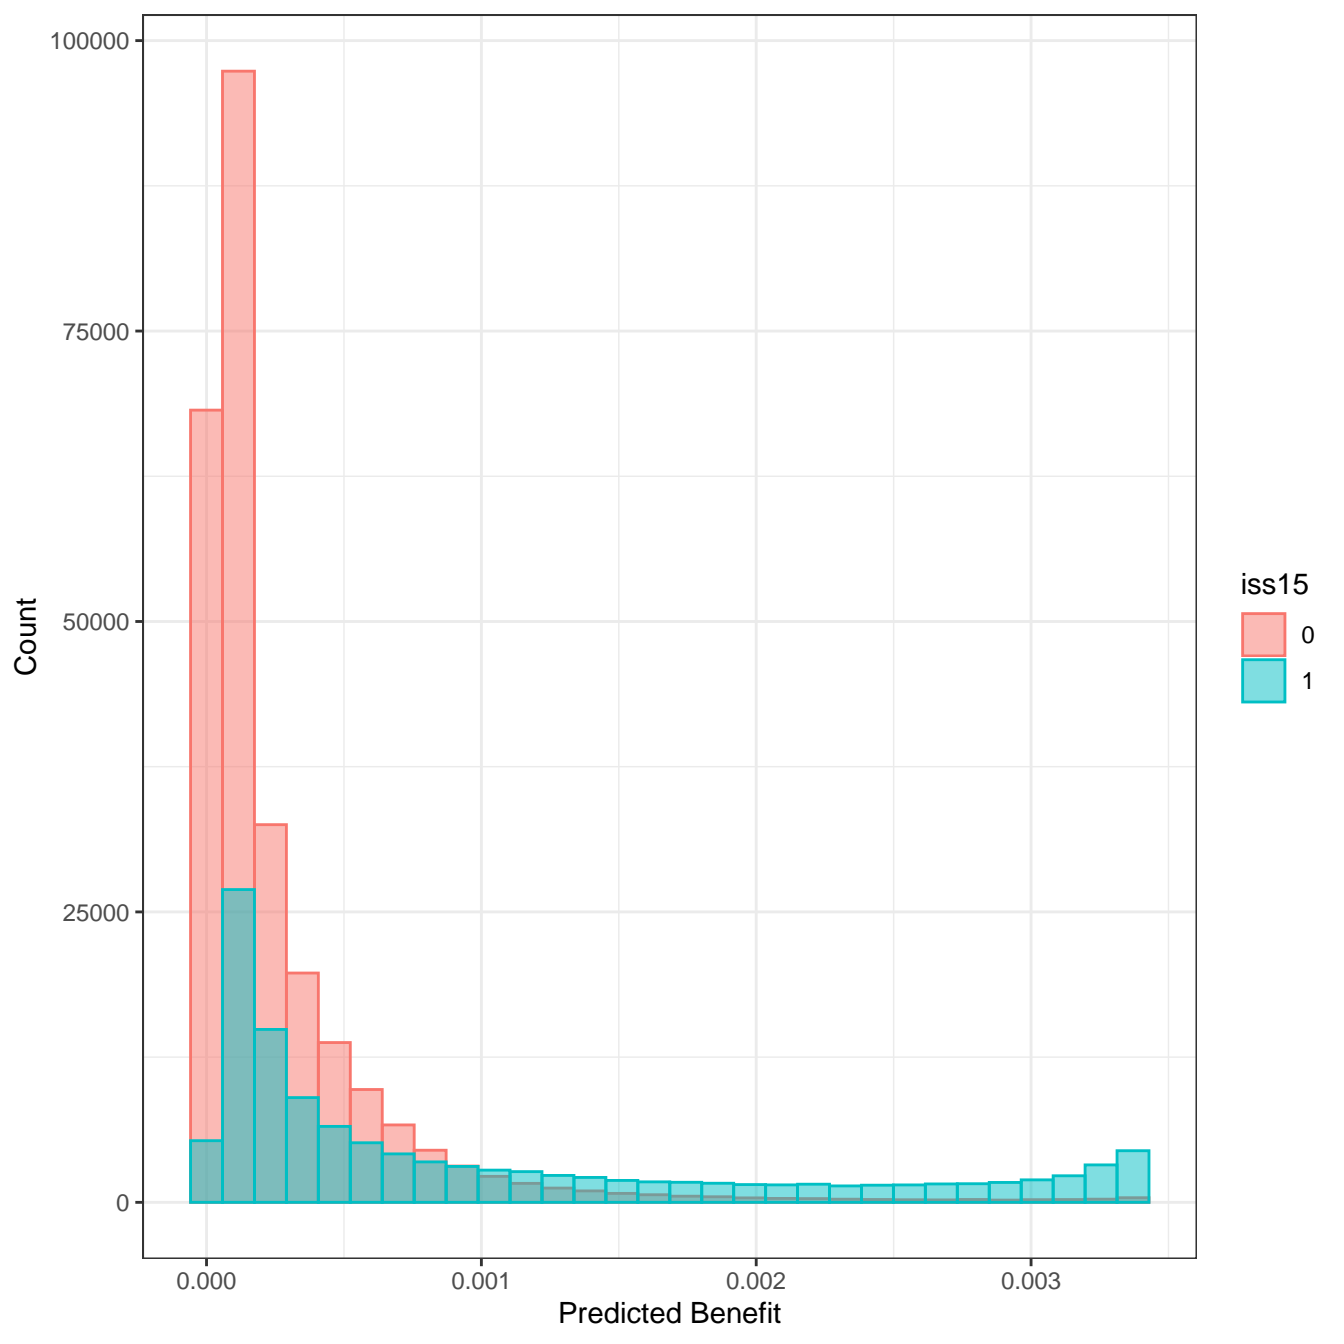

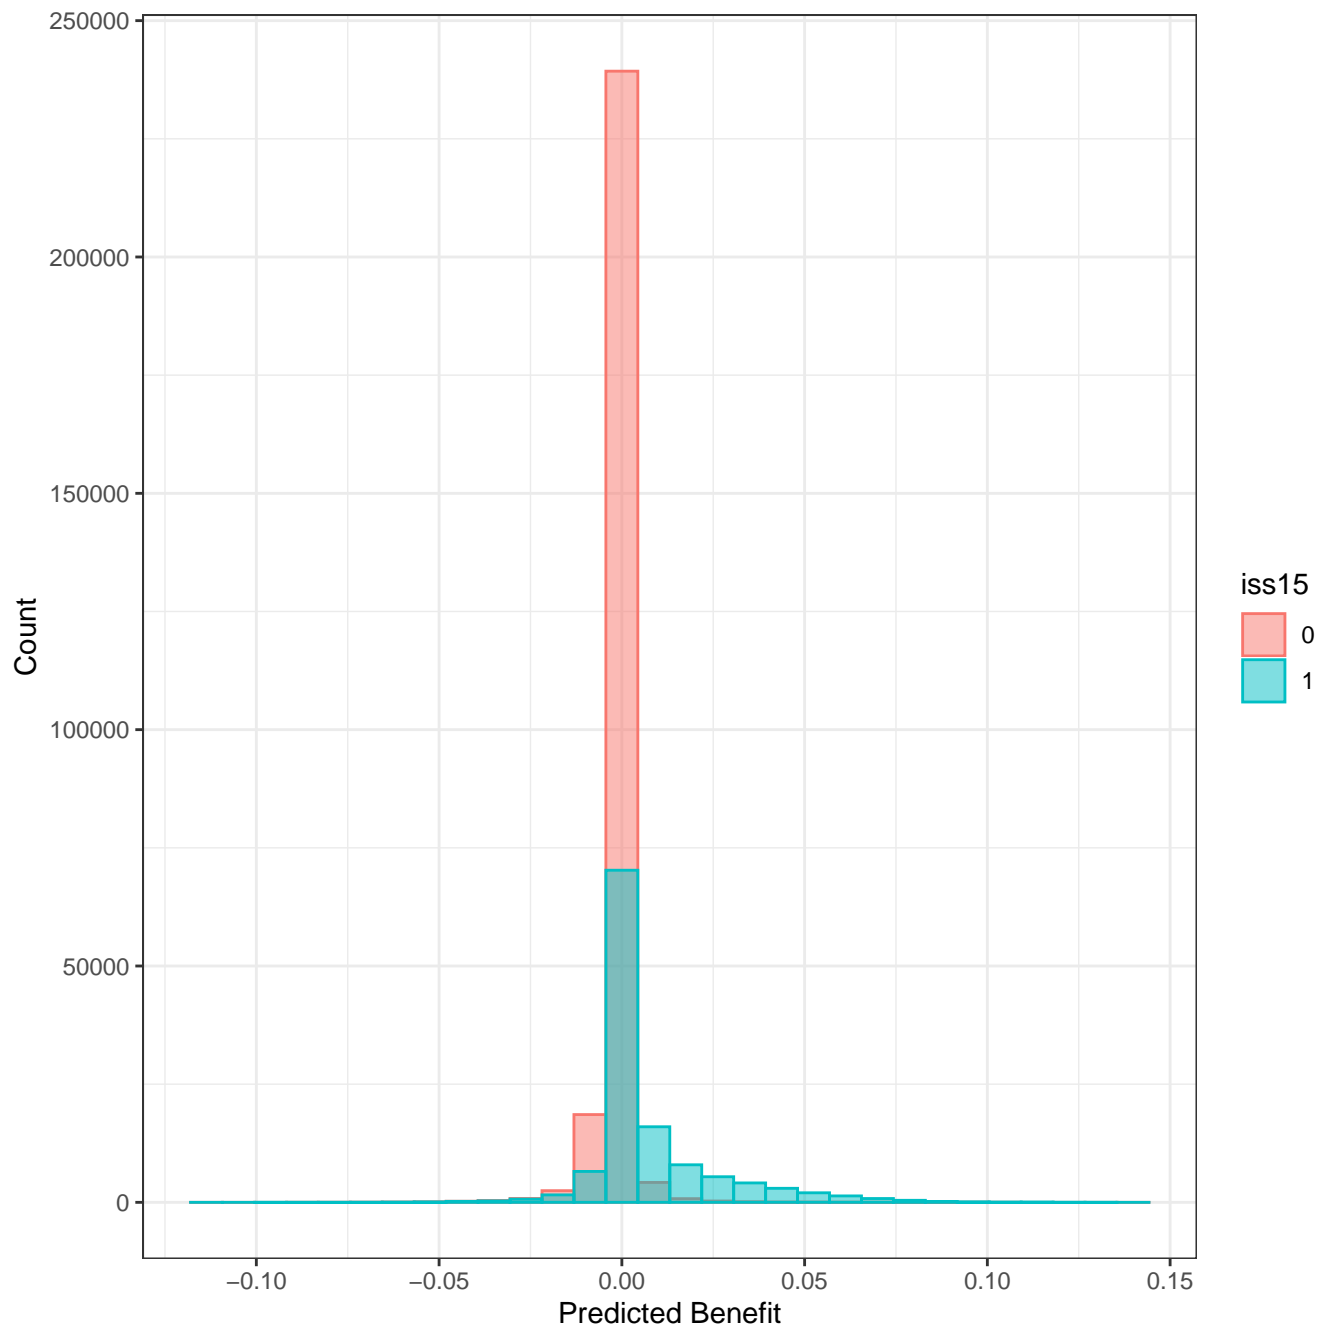

Supplement: 12873_2021_487_MOESM3_ESM.pdf [file 12873_2021_487_MOESM3_ESM.pdf]
